# Supplementary material for: RNA Cytidine Acetyltransferase of Small-Subunit Ribosomal RNA: Identification of Acetylation Sites and the Responsible Acetyltransferase in Fission Yeast, Schizosaccharomyces pombe
Source: PLoS One. 2014 Nov 17;9(11):e112156. doi: 10.1371/journal.pone.0112156 (PMC4234376; doi:10.1371/journal.pone.0112156)
Supplement: Table S2 — Oligonucleotides used in this study. (XLSX) [file pone.0112156.s007.xlsx]

## Sheet: Table S2
Table S2. Oligonucleotides used in this study.
Oligonucleotide name	Sequence	Usage
p18S-163-dna	AGTCGGGATTTTTAGCATGTATTAGCTC	RNase H digestion
p18S-534-dna	TGCCCTCCAATTGTTCCTCGTTAAG	RNase H digestion
p18S-688-dna	GAAGGTTAACGACCCCGGTC	RNase H digestion
p18S-982-dna	CTTCGATCCCCTAACTTTCGTTCTTGAT	RNase H digestion
p18S-1157-dna	CATTGTGGTGCCCTTCCGTCAATTC	RNase H digestion
p18S-1422-dna	CCTGTTATTGCCTCAAACTTCCATTGGC	RNase H digestion
Nockout_primer_F	TAACCAACTCCAAGCTTCCCATATAAAAGTTTCAGCAGAATTTTGTCTTTGCCAGTAGTCAAAACTATTTAAAGTAAAG AAGCTTAGCTACAAATCCCAC	Nat10 knock out in S. pombe using Ura4 cassete
Nockout_primer_R	CTATTCTAATAAATTTATTTTCCCACATAAAAACCTAAACCATTCACCAGTTTAAAACAAAACACGCGTAACTAATACAAGCTTGTGATATTGACGAAAC	Nat10 knock out in S. pombe using Ura4 cassete
Rescue_pombe_primer_F	CGACTCTAGAGGATCGG ATGCCCAAGAAAGCACTTGAC	Yeast Nat10 expression in S. pombe
Rescue_pombe_primer_R	ACCCGGGTTACTCGA CTATTTCCTAAATTTCTTCTTG	Yeast Nat10 expression in S. pombe
Rescue_human_primer_F	CGACTCTAGAGGATCGG ATGCATCGGAAAAAGGTGGATAAC	Human Nat10 expression in S. pombe
Rescue_human_primer_R	ACCCGGGTTACTCGA CTATTTCTTCCGCTTCAGTTTC	Human Nat10 expression in S. pombe
