# Supplementary material for: RNA Cytidine Acetyltransferase of Small-Subunit Ribosomal RNA: Identification of Acetylation Sites and the Responsible Acetyltransferase in Fission Yeast, Schizosaccharomyces pombe
Source: PLoS One. 2014 Nov 17;9(11):e112156. doi: 10.1371/journal.pone.0112156 (PMC4234376; doi:10.1371/journal.pone.0112156)
Supplement: Table S4 — Sequence identity of Nat10 proteins compared with Schizosaccharomyces pombe. (XLSX) [file pone.0112156.s009.xlsx]

## Sheet: Table S4
Table S4. Sequence identity of Nat10 proteins compared with Schizosaccharomyces pombe.
Taxonomy_Nat10	UniProt ID name	Identical amino acid a	Identity (%)
Schizosaccharomyces pombe	sp_YDK9_SCHPO	1033	100
Homo sapiens	sp_NAT10_HUMAN	559	54.1142
Mus musculus	sp_NAT10_MOUSE	554	53.6302
Gallus gallus	tr_E1C7J9_CHICK	567	54.8887
Danio rerio	tr_Q6PFQ5_DANRE	558	54.0174
Saccharomyces cerevisiae	sp_KRE33_YEAST	649	62.8267
Dictyostelium discoideum	sp_NAT10_DICDI	546	52.8558
Caenorhabditis elegans	sp_YIL8_CAEEL	493	47.7251
Arabidopsis thaliana	sp_U202A_ARATH	493	47.7251
Drosophila melanogaster	tr_H0RNM5_DROME	502	48.5963
a. Identity of amino acids was determined using ClustalW (http://www.clustal.org/clustal2/).
